# Supplementary material
Source: MDPI journal article supplement (https://www.mdpi.com/2304-6740/4/4/30)
Supplement: s1 [file s1]

# checkCIF/PLATON report

You have not supplied any structure factors. As a result the full set of tests cannot be run.

THIS REPORT IS FOR GUIDANCE ONLY. IF USED AS PART OF A REVIEW PROCEDURE FOR PUBLICATION, IT SHOULD NOT REPLACE THE EXPERTISE OF AN EXPERIENCED CRYSTALLOGRAPHIC REFEREE.

No syntax errors found.      CIF dictionary      Interpreting this report

## Datablock: VG-16-042B

---

Bond precision:    C-C = 0.0083 Å                      Wavelength=1.54184

Cell:                      a=10.5494(5)                      b=11.5375(6)                      c=21.871(1)  
                                    alpha=76.877(4)                      beta=82.084(4)                      gamma=85.941(4)  
Temperature:    173 K

|                        | Calculated                           | Reported                             |
|------------------------|--------------------------------------|--------------------------------------|
| Volume                 | 2565.6(2)                            | 2565.6(2)                            |
| Space group            | P -1                                 | P -1                                 |
| Hall group             | -P 1                                 | -P 1                                 |
| Moiety formula         | C52 H48 F3 N2 O P3 Ru Si,<br>C H Cl3 | C52 H48 F3 N2 O P3 Ru Si,<br>C H Cl3 |
| Sum formula            | C53 H49 Cl3 F3 N2 O P3 Ru<br>Si      | C53 H49 Cl3 F3 N2 O P3 Ru<br>Si      |
| Mr                     | 1115.36                              | 1115.42                              |
| Dx, g cm <sup>-3</sup> | 1.444                                | 1.444                                |
| Z                      | 2                                    | 2                                    |
| Mu (mm <sup>-1</sup> ) | 5.439                                | 5.439                                |
| F000                   | 1140.0                               | 1147.4                               |
| F000'                  | 1147.13                              |                                      |
| h,k,lmax               | 12,14,26                             | 12,14,26                             |
| Nref                   | 10037                                | 9464                                 |
| Tmin,Tmax              | 0.509,0.762                          | 0.397,1.000                          |
| Tmin'                  | 0.385                                |                                      |

Correction method= # Reported T Limits: Tmin=0.397 Tmax=1.000  
AbsCorr = MULTI-SCAN

Data completeness= 0.943                      Theta(max)= 71.740

R(reflections)= 0.0567( 8126)                      wR2(reflections)= 0.1894( 9464)

S = 1.303                      Npar= 607

---

The following ALERTS were generated. Each ALERT has the format

**test-name\_ALERT\_alert-type\_alert-level.**

Click on the hyperlinks for more details of the test.

---

 **Alert level B**

PLAT029\_ALERT\_3\_B \_diffrn\_measured\_fraction\_theta\_full value Low . 0.943 Note

**Author Response: a software glitch prevented collectino to 100%**

PLAT230\_ALERT\_2\_B Hirshfeld Test Diff for N1 -- C5 .. 8.3 s.u.

---

 **Alert level C**

PLAT213\_ALERT\_2\_C Atom F3 has ADP max/min Ratio .... 3.3 prolat  
 PLAT244\_ALERT\_4\_C Low 'Solvent' Ueq as Compared to Neighbors of C01V Check  
 PLAT342\_ALERT\_3\_C Low Bond Precision on C-C Bonds ..... 0.00834 Ang.

---

 **Alert level G**

PLAT068\_ALERT\_1\_G Reported F000 Differs from Calcd (or Missing)... Please Check  
 PLAT154\_ALERT\_1\_G The s.u.'s on the Cell Angles are Equal ..(Note) 0.004 Degree  
 PLAT178\_ALERT\_4\_G The CIF-Embedded .res File Contains SIMU Records 2 Report  
 PLAT186\_ALERT\_4\_G The CIF-Embedded .res File Contains ISOR Records 1 Report  
 PLAT232\_ALERT\_2\_G Hirshfeld Test Diff (M-X) Ru1 -- C2 .. 7.5 s.u.  
 PLAT242\_ALERT\_2\_G Low 'MainMol' Ueq as Compared to Neighbors of C01U Check  
 PLAT328\_ALERT\_4\_G Possible Missing H on sp3? Phosphorus ..... P1 Check  
 PLAT343\_ALERT\_2\_G Unusual sp? Angle Range in Main Residue for C1 Check  
 PLAT431\_ALERT\_2\_G Short Inter HL..A Contact Cl1 .. O1 .. 3.12 Ang.  
 PLAT720\_ALERT\_4\_G Number of Unusual/Non-Standard Labels ..... 3 Note  
 PLAT790\_ALERT\_4\_G Centre of Gravity not Within Unit Cell: Resd. # 2 Note  
 C H Cl3  
 PLAT982\_ALERT\_1\_G The C-f' = 0.019 Deviates from the IT-value 0.018 Check  
 PLAT982\_ALERT\_1\_G The Cl-f' = 0.368 Deviates from the IT-value 0.364 Check  
 PLAT982\_ALERT\_1\_G The F-f' = 0.075 Deviates from the IT-value 0.073 Check  
 PLAT982\_ALERT\_1\_G The N-f' = 0.033 Deviates from the IT-value 0.031 Check  
 PLAT982\_ALERT\_1\_G The O-f' = 0.052 Deviates from the IT-value 0.049 Check  
 PLAT982\_ALERT\_1\_G The P-f' = 0.304 Deviates from the IT-value 0.296 Check  
 PLAT982\_ALERT\_1\_G The Ru-f' = 0.075 Deviates from the IT-value 0.055 Check  
 PLAT982\_ALERT\_1\_G The Si-f' = 0.255 Deviates from the IT-value 0.254 Check  
 PLAT983\_ALERT\_1\_G The Ru-f" = 3.268 Deviates from the IT-Value 3.296 Check

- 
- 0 **ALERT level A** = Most likely a serious problem - resolve or explain
  - 2 **ALERT level B** = A potentially serious problem, consider carefully
  - 3 **ALERT level C** = Check. Ensure it is not caused by an omission or oversight
  - 20 **ALERT level G** = General information/check it is not something unexpected
- 
- 11 ALERT type 1 CIF construction/syntax error, inconsistent or missing data
  - 6 ALERT type 2 Indicator that the structure model may be wrong or deficient
  - 2 ALERT type 3 Indicator that the structure quality may be low
  - 6 ALERT type 4 Improvement, methodology, query or suggestion
  - 0 ALERT type 5 Informative message, check
- 

**Validation response form**

Please find below a validation response form (VRF) that can be filled in and pasted into your CIF.

```
# start Validation Reply Form
_vrf_PLAT230_VG-16-042B
;
PROBLEM: Hirshfeld Test Diff for    N1      --  C5      ..      8.3 s.u.
RESPONSE: ...
;
# end Validation Reply Form
```

---

It is advisable to attempt to resolve as many as possible of the alerts in all categories. Often the minor alerts point to easily fixed oversights, errors and omissions in your CIF or refinement strategy, so attention to these fine details can be worthwhile. In order to resolve some of the more serious problems it may be necessary to carry out additional measurements or structure refinements. However, the purpose of your study may justify the reported deviations and the more serious of these should normally be commented upon in the discussion or experimental section of a paper or in the "special\_details" fields of the CIF. checkCIF was carefully designed to identify outliers and unusual parameters, but every test has its limitations and alerts that are not important in a particular case may appear. Conversely, the absence of alerts does not guarantee there are no aspects of the results needing attention. It is up to the individual to critically assess their own results and, if necessary, seek expert advice.

#### **Publication of your CIF in IUCr journals**

A basic structural check has been run on your CIF. These basic checks will be run on all CIFs submitted for publication in IUCr journals (*Acta Crystallographica*, *Journal of Applied Crystallography*, *Journal of Synchrotron Radiation*); however, if you intend to submit to *Acta Crystallographica Section C* or *E* or *IUCrData*, you should make sure that full publication checks are run on the final version of your CIF prior to submission.

#### **Publication of your CIF in other journals**

Please refer to the *Notes for Authors* of the relevant journal for any special instructions relating to CIF submission.

---

**PLATON version of 11/08/2016; check.def file version of 04/08/2016**
